# Supplementary material for: The canine gut microbiome is associated with higher risk of gastric dilatation-volvulus and high risk genetic variants of the immune system
Source: PubMed Central journal article supplement (PMC5995382; doi:10.1371/journal.pone.0197686), 2018-06-11

**S1 Fig. ROC Curve for prediction of GVD using at least one risk allele, Actinobacteria, and temperament. (AUC=0.864)**

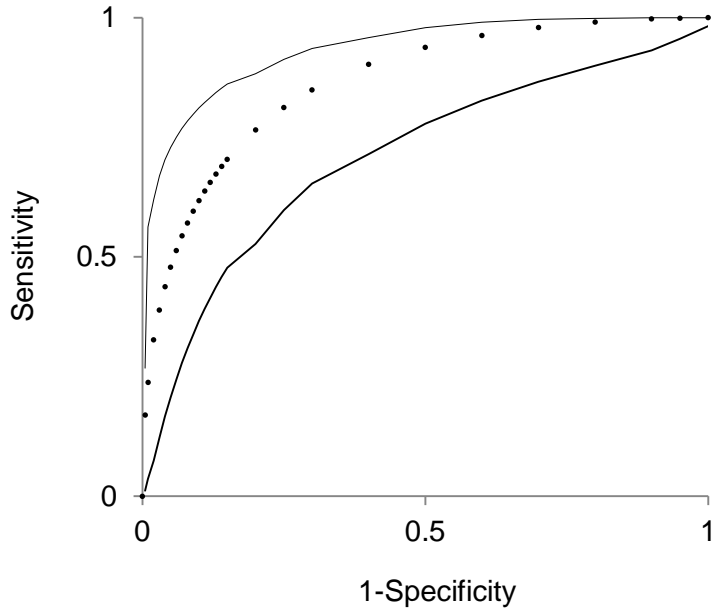

Supplement: pone.0197686.s001.pdf [file pone.0197686.s001.pdf]
